# Supplementary material
Source: publisher figshare collection journal article supplement (https://gsajournals.figshare.com/articles/dataset/_/9816401)
Supplement: Supplementary file 1 [file 1]

**Figure S1. Example images of *egl-1* reporter expression in URX in eggs.** Shown are two representative examples of eggs carrying an array with *Pgcy-32::GFP* and *Pegl-1::mCherry*, with arrows indicating the URX cell body. Asterisks in the second column indicate GFP expression in coelomocytes due to the *Punc-122::GFP* co-injection marker. Pictures of *Pegl-1::mCherry* in the third column were taken at the same exposure as those in Figure 1B to show relative expression level, and then the contrast was increased in the final column to more easily visualize the expression pattern. Scale bars are 5µm.

**Figure S2. Promoter truncations to identify *egl-1* regulatory region necessary for URX expression.**

Top shows a schematic of the *egl-1* reporter after replacement of the *egl-1* genomic region with *mCherry*. Grey line indicates area enlarged below. The *egl-1* 5'UTR is shown in black, *mCherry* is shown in red, and the transcriptional start site is shown with a bent arrow.
