# Supplementary material
Source: publisher figshare collection journal article supplement (https://gsajournals.figshare.com/articles/dataset/_/9816401)
Supplement: Supplementary file 2 [file 1]

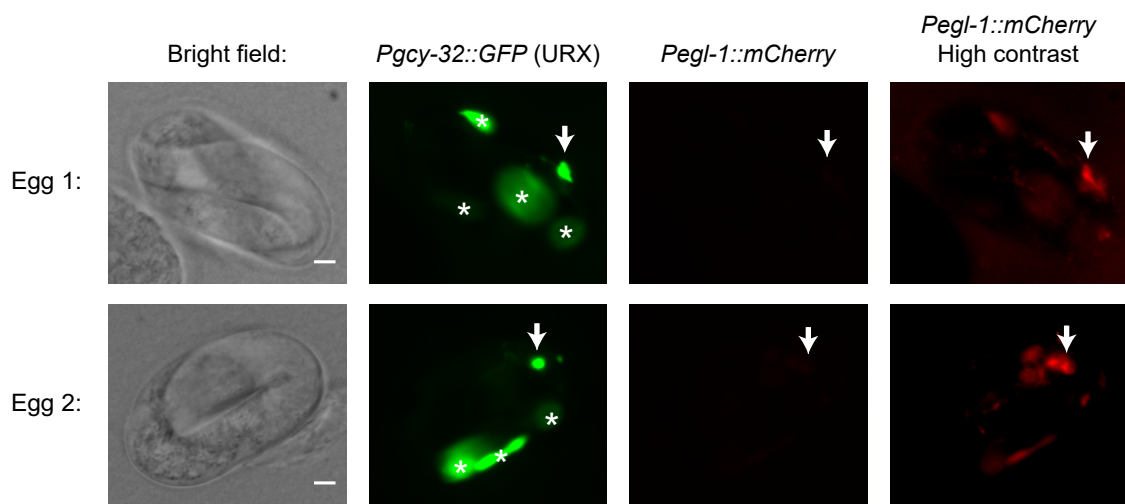

Supplemental Figure 1. Example images of *egl-1* reporter expression in URX in eggs.

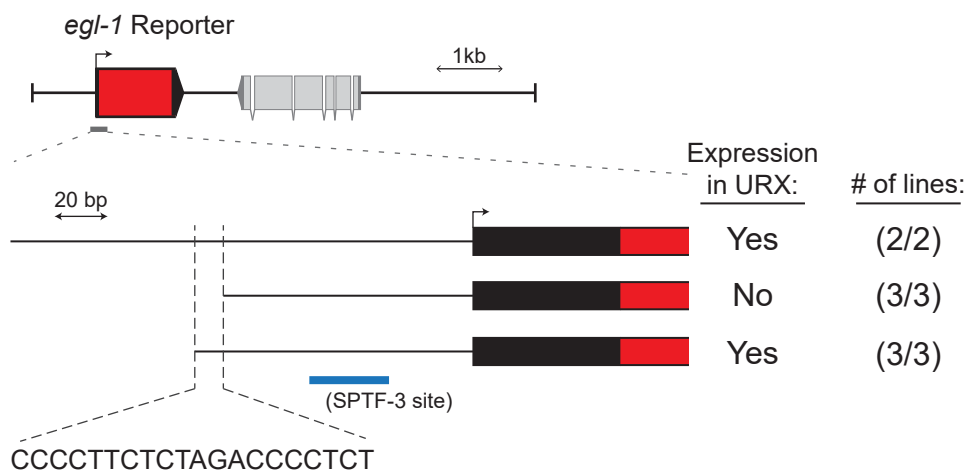

Supplemental Figure 2. Promoter truncations to identify *egl-1* regulatory region necessary for URX expression.
